# Supplementary material for: Curcumin-Mediated Resistance to Lenvatinib via EGFR Signaling Pathway in Hepatocellular Carcinoma
Source: MDPI journal article supplement (doi:10.3390/cells12040612), 2023-02-14
Supplement: s1 [file s1]

**Table S1.** the list of primer sequences

| Gene symbol | Forward sequence        | Reverse sequence        |
|-------------|-------------------------|-------------------------|
| EGFR        | TTGCCGCAAAGTGTGTAACG    | GTCACCCCTAAATGCCACCG    |
| AKT         | GCTGGACGATAGCTTGA       | GATGACAGATAGCTGGTG      |
| mTOR        | GCAGATTTGCCAACTATCTTCGG | CAGCGGTAAAAGTGTCCCCTG   |
| CD44        | CAATAGCACCTTGCCCACAAT   | AATCACCACGTGCCCTTCTATGG |
| CD133       | CAGAGTACAACGCCAAACCA    | AAATCACGATGAGGGTCAGC    |
| GAPDH       | TGAACGGGAAGCTCACTG      | TCCACCACCCTGTTGCTGTA    |

**Table S2.** the list of antibodies

| Target          | ID         | Company                            |
|-----------------|------------|------------------------------------|
| EGFR            | #4267      | Cell Signaling Technology, MA, USA |
| AKT             | #4691      | Cell Signaling Technology, MA, USA |
| mTOR            | #4517      | Cell Signaling Technology, MA, USA |
| GAPDH           | 10494-1-AP | Proteintech Group Inc, IL, USA     |
| Anti-rabbit IgG | #7074      | Cell Signaling Technology, MA, USA |
| Anti-mouse IgG  | #7076      | Cell Signaling Technology, MA, USA |

**Table S3.** KEGG pathway analysis

| KEGG pathway                                      | Gene count | Fold enrichment | P-Value  |
|---------------------------------------------------|------------|-----------------|----------|
| Metabolic pathways                                | 272        | 1.3             | 1.60E-08 |
| Pathways in cancer                                | 94         | 1.3             | 1.80E-03 |
| Human papillomavirus infection                    | 64         | 1.5             | 1.30E-03 |
| <b><u>PI3K-Akt signaling pathway</u></b>          | 59         | 1.3             | 4.20E-02 |
| MAPK signaling pathway                            | 57         | 1.5             | 2.30E-03 |
| Lysosome                                          | 50         | 2.9             | 2.00E-12 |
| Salmonella infection                              | 46         | 1.4             | 1.50E-02 |
| Endocytosis                                       | 45         | 1.4             | 2.60E-02 |
| Rap1 signaling pathway                            | 44         | 1.6             | 1.80E-03 |
| Human cytomegalovirus infection                   | 41         | 1.4             | 2.70E-02 |
| Shigellosis                                       | 41         | 1.3             | 9.20E-02 |
| Protein processing in the endoplasmic reticulum   | 40         | 1.8             | 3.20E-04 |
| Chemical carcinogenesis - reactive oxygen species | 40         | 1.4             | 3.60E-02 |
| Autophagy - animal                                | 38         | 2               | 2.00E-05 |
| Pathogenic Escherichia coli infection             | 38         | 1.5             | 1.50E-02 |
| Human T-cell leukemia virus 1 infection           | 38         | 1.3             | 7.30E-02 |
| Axon guidance                                     | 36         | 1.5             | 1.20E-02 |
| Kaposi sarcoma-associated herpesvirus infection   | 36         | 1.4             | 3.00E-02 |
| Focal adhesion                                    | 36         | 1.4             | 4.80E-02 |
| Wnt signaling pathway                             | 33         | 1.5             | 2.10E-02 |
| Hippo signaling pathway                           | 31         | 1.5             | 2.10E-02 |
| Cell adhesion molecules                           | 30         | 1.5             | 3.50E-02 |
| Alcoholic liver disease                           | 29         | 1.6             | 1.70E-02 |
| FoxO signaling pathway                            | 28         | 1.6             | 1.10E-02 |
| Cellular senescence                               | 28         | 1.4             | 7.90E-02 |
| Ubiquitin mediated proteolysis                    | 27         | 1.4             | 4.80E-02 |

|                                                            |    |     |          |
|------------------------------------------------------------|----|-----|----------|
| Phospholipase D signaling pathway                          | 27 | 1.4 | 7.30E-02 |
| Gastric cancer                                             | 27 | 1.4 | 7.80E-02 |
| Apoptosis                                                  | 25 | 1.4 | 7.90E-02 |
| Fluid shear stress and atherosclerosis                     | 25 | 1.4 | 9.60E-02 |
| Pancreatic cancer                                          | 24 | 2.4 | 7.10E-05 |
| Neurotrophin signaling pathway                             | 24 | 1.5 | 3.50E-02 |
| Insulin resistance                                         | 23 | 1.6 | 2.30E-02 |
| Th17 cell differentiation                                  | 23 | 1.6 | 2.30E-02 |
| Growth hormone synthesis, secretion, and action            | 23 | 1.5 | 6.40E-02 |
| AGE-RAGE signaling pathway in diabetic complications       | 22 | 1.7 | 1.90E-02 |
| Sphingolipid signaling pathway                             | 22 | 1.4 | 9.50E-02 |
| Adherens junction                                          | 21 | 2.2 | 5.90E-04 |
| Small cell lung cancer                                     | 20 | 1.7 | 2.90E-02 |
| Choline metabolism in cancer                               | 20 | 1.6 | 5.10E-02 |
| Parathyroid hormone synthesis, secretion, and action       | 20 | 1.4 | 9.70E-02 |
| Peroxisome                                                 | 19 | 1.8 | 1.80E-02 |
| Colorectal cancer                                          | 19 | 1.7 | 2.90E-02 |
| Bile secretion                                             | 19 | 1.6 | 3.90E-02 |
| Phosphatidylinositol signaling system                      | 19 | 1.5 | 8.00E-02 |
| Epithelial cell signaling in Helicobacter pylori infection | 18 | 2   | 7.90E-03 |
| GnRH signaling pathway                                     | 18 | 1.5 | 9.70E-02 |
| Notch signaling pathway                                    | 17 | 2.2 | 3.10E-03 |
| Mitophagy - animal                                         | 17 | 1.8 | 2.30E-02 |
| <b><u>EGFR tyrosine kinase inhibitor resistance</u></b>    | 17 | 1.6 | 4.90E-02 |

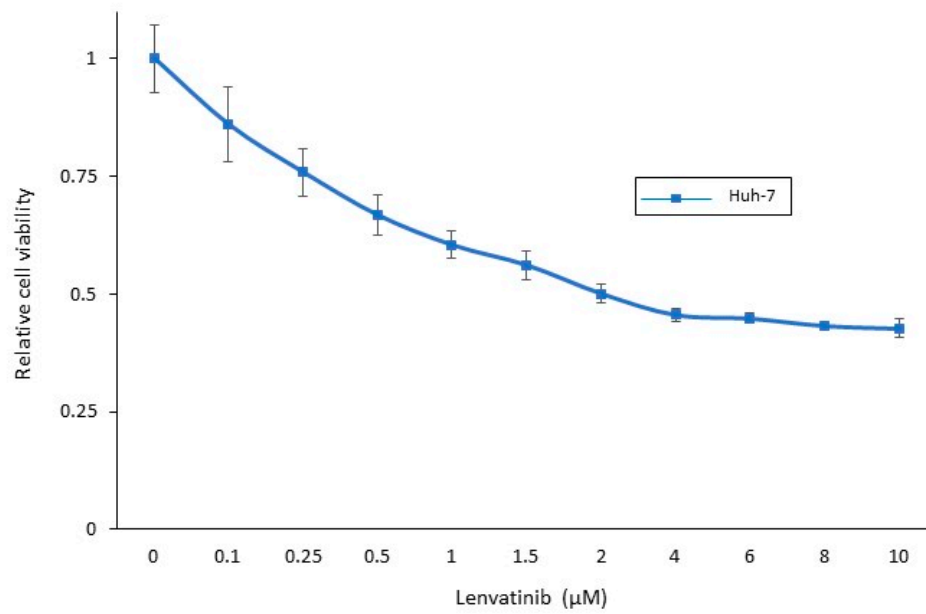

**Figure S1.** Cell viability assay for a lower concentration of Lenvatinib in Huh-7 cells.

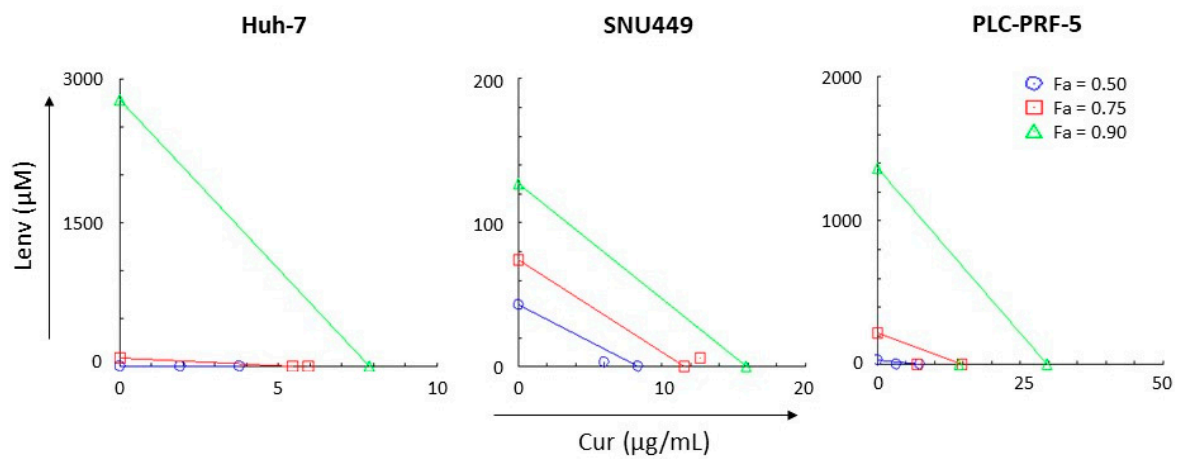

**Figure S2.** Isobologram analysis of Curcumin and Lenvatinib combination in resistant Huh-7 and PLC-PRF-5 cell lines.

A

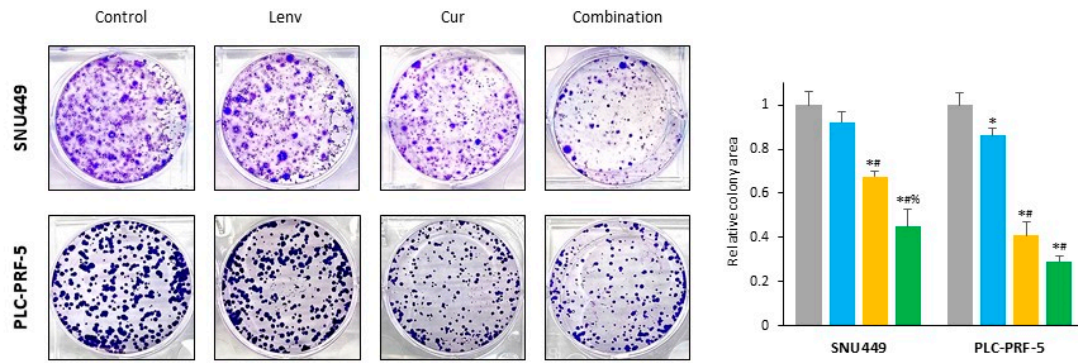

B

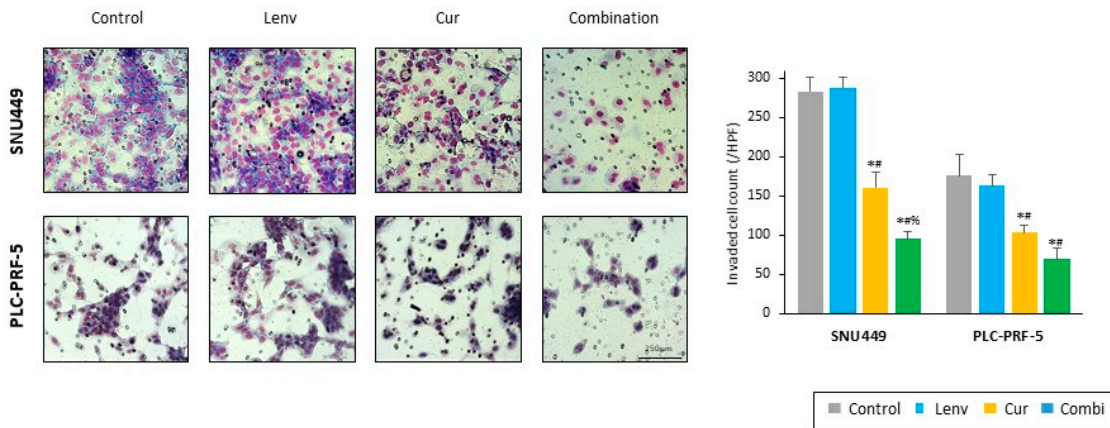

**Figure S3.** Curcumin enhanced the anti-tumor effects of Lenvatinib by inhibiting colony formation and invasion. A) Colony formation assays of SNU449 and PLC-PRF-5 following treatment (\*:  $p < 0.05$  vs. control, #:  $p < 0.05$  vs. Lenvatinib, %:  $p < 0.05$  vs. Curcumin). B) Invasion assays following treatment in SNU449 and PLC-PRF-5. Scale bar = 250  $\mu$ m. The number of invaded cells was randomly counted at three fields per membrane (\*:  $p < 0.05$  vs. control, #:  $p < 0.05$  vs. Lenvatinib, %:  $p < 0.05$  vs. Curcumin). Images show representative fields on the membrane (magnification  $\times 400$ ). The data indicate mean (column)  $\pm$  SD values. SD, standard deviation.

Figure 5

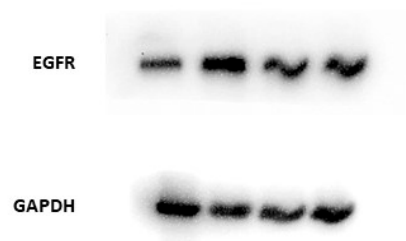

Figure 6

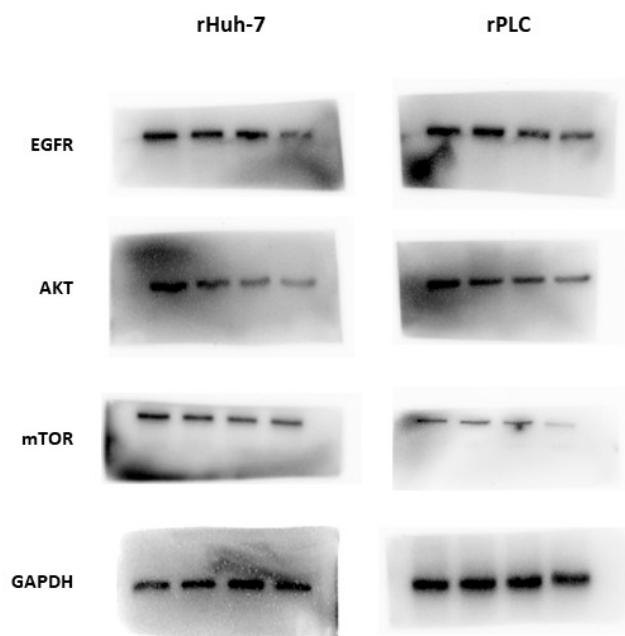

Figure S4. Original Western Blots
